# Supplementary material for: Fabrication of core–shell liquid metal@silica nanoparticles for enhanced mechanical, dielectric and thermal properties of silicone rubber
Source: Royal Society of Chemistry journal article supplement (doi:10.1039/d3ce00198a), 2023-01-01
Supplement: d3ce00198a1.pdf [file d3ce00198a1.pdf]

## Supporting Information

### Fabrication of core-shelled liquid-metal@silica nanoparticles for enhanced mechanical, dielectric and thermal properties of silicone rubber

Guizhi Zhu,<sup>a,b,†</sup> Yuliang Tian,<sup>a,b,‡</sup> Junrui Tan,<sup>b,c</sup> Qiong Wu,<sup>b,c</sup> Longfei Tan,<sup>b,c</sup> Xiangling Ren,<sup>b,c</sup> Changhui Fu,<sup>b,c</sup> Zhihui Chen,<sup>b</sup> and Xianwei Meng<sup>b,c,\*</sup>

<sup>a</sup> School of Materials Science and Engineering, Changzhou University, Changzhou, Jiangsu, 213164, China.

<sup>b</sup> Laboratory of Controllable Preparation and Application of Nanomaterials, Technical Institute of Physics and Chemistry, Chinese Academy of Sciences, No. 29 East Road Zhongguancun, Beijing, 100190, P. R. China.

<sup>c</sup> Key Laboratory of Cryogenics, Technical Institute of Physics and Chemistry, Chinese Academy of Science, Beijing, 100190, PR China

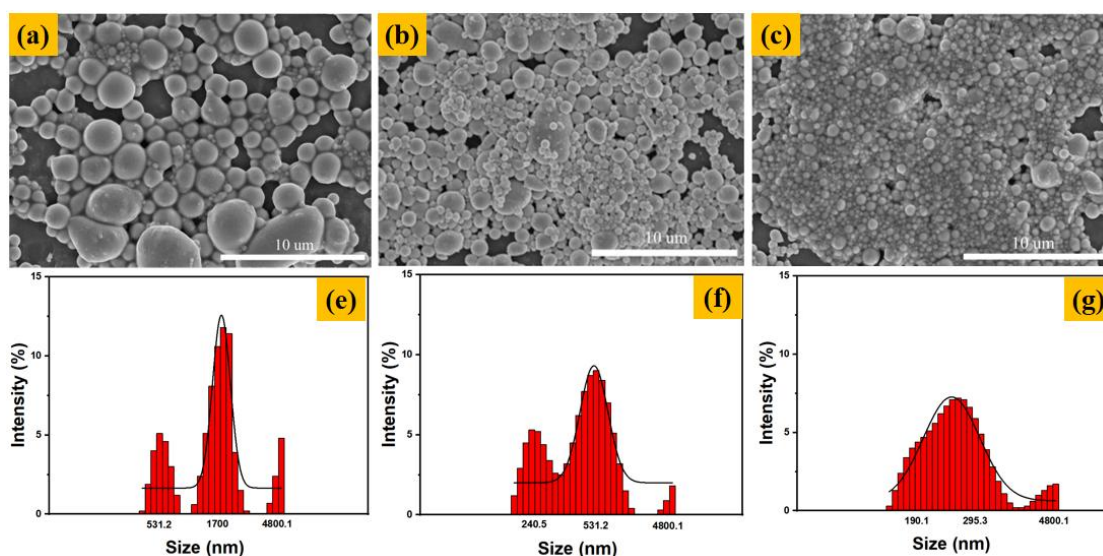

**Figure S1.** SEM images and particle size distribution of liquid metal nanodroplet:(a) (e)60min; (b) (f) 120 min; (c) (g) 180 min.

**Table S1.** Compositions of the reaction mixtures

| Samples                | LM    | Ammonia water | Ethanol | TEOS   |
|------------------------|-------|---------------|---------|--------|
| LM@SiO <sub>2</sub> -1 | 200mg | 3ml           | 60ml    | 150ul  |
| LM@SiO <sub>2</sub> -2 | 200mg | 3ml           | 60ml    | 300ul  |
| LM@SiO <sub>2</sub> -3 | 200mg | 3ml           | 60ml    | 500ul  |
| LM@SiO <sub>2</sub> -4 | 200mg | 3ml           | 60ml    | 1000ul |

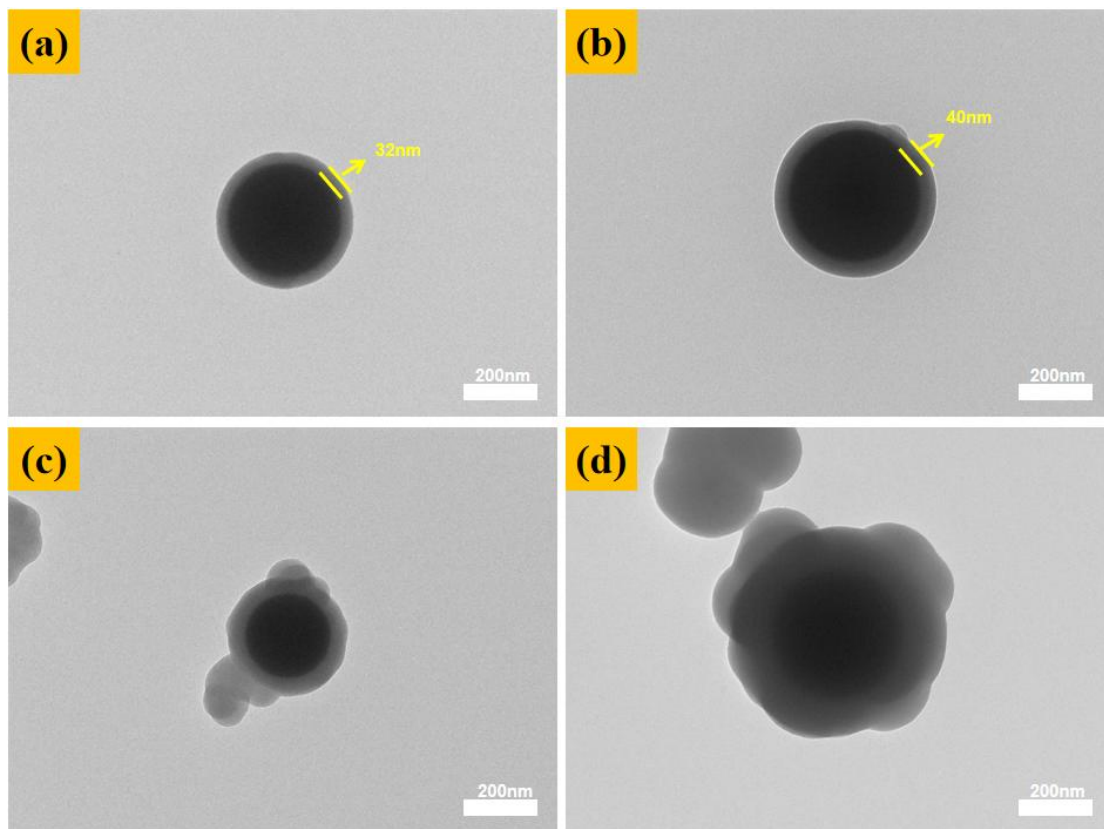

**Figure S2.** TEM images of LM@SiO<sub>2</sub>-NH<sub>2</sub> of different polymer shell thickness: (a)LM@SiO<sub>2</sub>-1 (b)LM@SiO<sub>2</sub>-2 (c)LM@SiO<sub>2</sub>-3 (d) LM@SiO<sub>2</sub>-4.

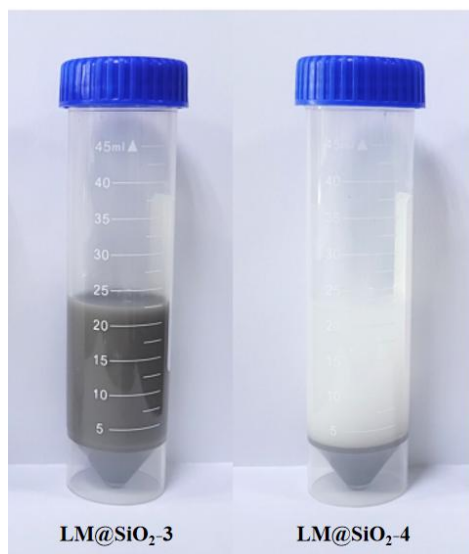

**Figure S3.** LM@SiO<sub>2</sub>-2 and LM@SiO<sub>2</sub>-3 dispersion of nanodroplets in ethanol solvent within one week.

**Table S2.** Components of Silicone Rubbers

| Sample                                             | PDMS (g) | LM@SiO <sub>2</sub> -NH <sub>2</sub> (g) | LM@SiO <sub>2</sub> (g) | LM (g) | SiO <sub>2</sub> (g) | Total amount of filler (g) |
|----------------------------------------------------|----------|------------------------------------------|-------------------------|--------|----------------------|----------------------------|
| PDMS                                               | 1.5      | 0                                        | /                       | /      | /                    | 0                          |
| 10 wt.% LM@SiO <sub>2</sub> -NH <sub>2</sub> /PDMS | 1.5      | 0.167                                    | /                       | /      | /                    | 0.167                      |
| 20 wt.% LM@SiO <sub>2</sub> -NH <sub>2</sub> /PDMS | 1.5      | 0.375                                    | /                       | /      | /                    | 0.375                      |
| 40 wt.% LM@SiO <sub>2</sub> -NH <sub>2</sub> /PDMS | 1.5      | 1                                        | /                       | /      | /                    | 1                          |
| 40 wt.% LM@SiO <sub>2</sub> /PDMS                  | 1.5      | /                                        | 1                       | /      | /                    | 1                          |
| 40 wt.% LM+SiO <sub>2</sub> /PDMS                  | 1.5      | /                                        | /                       | 0.333  | 0.667                | 1                          |

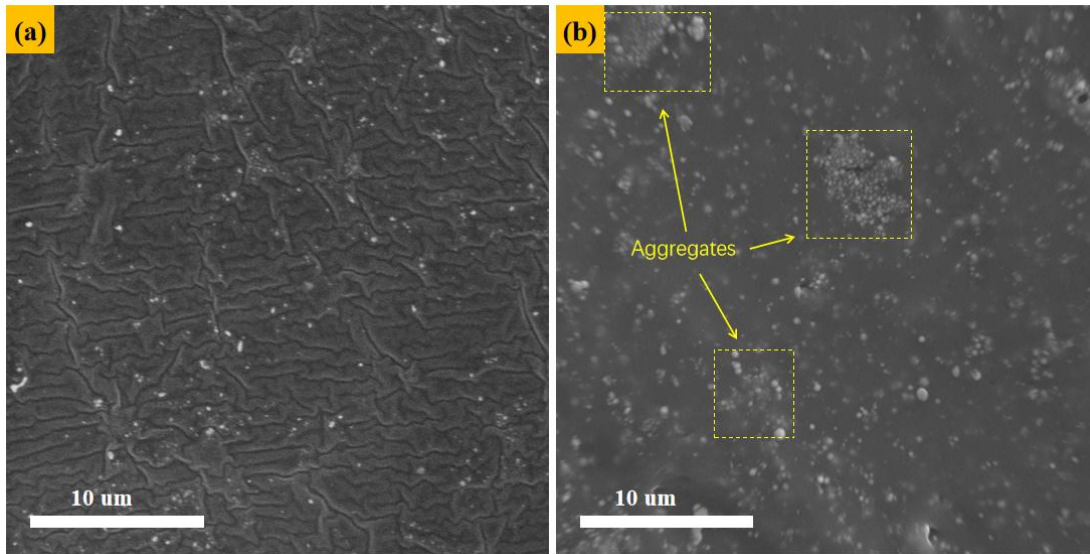

**Figure S4.** SEM of fracture sections of (a) LM@SiO<sub>2</sub>-NH<sub>2</sub>/PDMS nanocomposites (b) LM@SiO<sub>2</sub>/PDMS nanocomposites.

**Table S3.** Comparison of dielectric properties between different polymer composites

| Composites                                                            | Dielectric Constant | Dielectric Loss | Reference         |
|-----------------------------------------------------------------------|---------------------|-----------------|-------------------|
| CCTO@PANI/<br>PDMS                                                    | 4.2                 | 0.03            | 31                |
| PVDF/ZnO-APTES                                                        | 11                  | 0.01            | 32                |
| PDMS-<br>PbZr <sub>0.52</sub> Ti <sub>0.48</sub> O <sub>3</sub> (PZT) | 10.5                | 0.75            | 33                |
| Calcium copper<br>titanate(CCTO)/<br>PDMS                             | 4.18                | 0.05            | 34                |
| Coral-like BaTiO <sub>3</sub> /<br>PDMS                               | 10.97               | 1.1             | 35                |
| <b>LM@SiO<sub>2</sub>-<br/>NH<sub>2</sub>/PDMS</b>                    | <b>13.9</b>         | <b>0.006</b>    | <b>This study</b> |

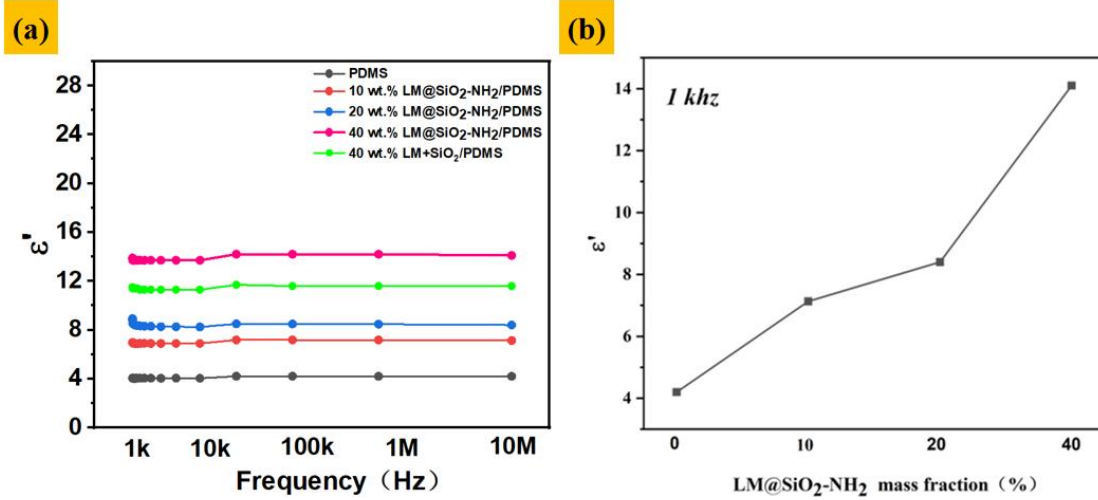

**Figure S5.** (a) Dielectric properties of LM@SiO<sub>2</sub>-NH<sub>2</sub>/PDMS and LM+SiO<sub>2</sub>/PDMS, (b) dielectric constant of LM@SiO<sub>2</sub>-NH<sub>2</sub>/PDMS composites under different mass fractions.

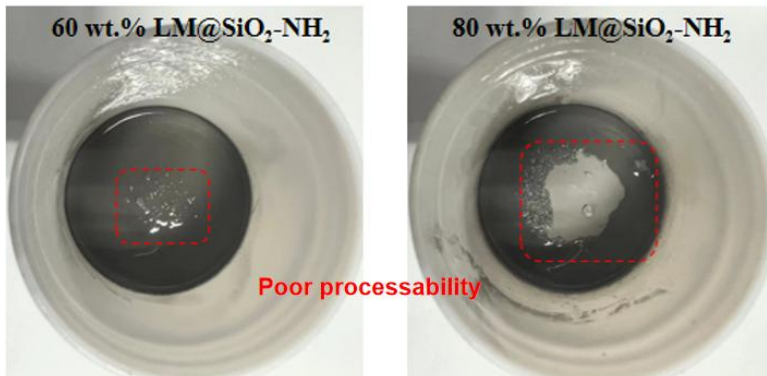

**Figure S6.** Optical photograph of 60 wt% and 80 wt% of LM@SiO<sub>2</sub>-NH<sub>2</sub>/PDMS

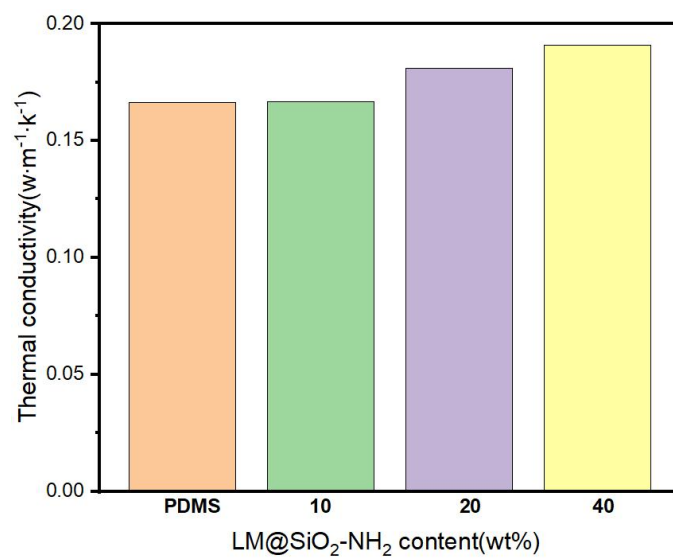

**Figure S7.** Thermal conductivity of LM@SiO<sub>2</sub>-NH<sub>2</sub>/PDMS composites under different mass fractions.
